# Supplementary material for: Acute transcriptional up-regulation specific to osteoblasts/osteoclasts in medaka fish immediately after exposure to microgravity
Source: PubMed Central journal article supplement (PMC5177882; doi:10.1038/srep39545), 2016-12-22
Supplement: srep39545-s1.pdf [file srep39545-s1.pdf]

1 Acute transcriptional up-regulation specific to osteoblasts/osteoclasts in medaka fish  
2 immediately after exposure to microgravity  
3 Masahiro Chatani,<sup>1,†</sup> Hiroya Morimoto,<sup>1</sup> Kazuhiro Takeyama,<sup>1</sup> Akiko Mantoku,<sup>1</sup> Naoki  
4 Tanigawa,<sup>2</sup> Koji Kubota,<sup>2</sup> Hiromi Suzuki,<sup>3</sup> Satoko Uchida,<sup>3</sup> Fumiaki Tanigaki,<sup>4</sup> Masaki  
5 Shirakawa,<sup>4</sup> Oleg Gusev,<sup>5,††</sup> Vladimir Sychev,<sup>6</sup> Yoshiro Takano,<sup>7</sup> Takehiko Itoh,<sup>1</sup> and  
6 Akira Kudo<sup>1</sup>

7 <sup>1</sup> Graduate School of Bioscience and Biotechnology, Tokyo Institute of Technology,  
8 Yokohama 226-8501, Japan

9 <sup>2</sup> Chiyoda Corporation, Yokohama 220-8765, Japan

10 <sup>3</sup> Department of Science and Applications, Japan Space Forum, Tokyo 101-0062, Japan

11 <sup>4</sup> Japan Aerospace Exploration Agency, Tsukuba 305-8505, Japan

12 <sup>5</sup> Institute of Fundamental Medicine and Biology, Kazan Federal University, Kazan  
13 420008, Russia

14 <sup>6</sup> SSC RF-Institute of Biomedical Problems RAS, Moscow, Russia

15 <sup>7</sup> Section of Biostructural Science, Graduate School of Medical and Dental Sciences,  
16 Tokyo Medical and Dental University, Tokyo 113-8549, Japan

17

18 <sup>†</sup> Current address: Department of Pharmacology, School of Dentistry, Showa University,  
19 Tokyo 142-8555, Japan

20 <sup>††</sup> Current address: RIKEN Innovation Center, RIKEN, Yokohama 230-0045, Japan

21

22 Corresponding author:

23 *Akira Kudo, PhD*

24 *Department of Biological Information, Tokyo Institute of Technology*

25 4259-B-33 Nagatsuta, Midori-ku, Yokohama 226-8501, Japan

26 Tel: 81-45-924-5718, Fax: 81-45-924-5718, E-mail: akudo@bio.titech.ac.jp

27 Running title: Initial response of osteoblasts and osteoclasts to microgravity

28

29 **Supplementary Figure S1. Alizarin Red staining.**

30 (a-e) The larva, 5.0 mm in total length, was taken 3 days post hatching. Ventral view of  
31 pharyngeal bones in the head region is seen (a). Scale bar = 100  $\mu$ m. Enlarged views are  
32 focused on the lower pharyngeal bone (b), upper pharyngeal bone (c) and cleithrum (d).  
33 Lateral view of the head region is shown (e). Yellow arrows indicate the pharyngeal  
34 bones. Up, upper pharyngeal bone; lp, lower pharyngeal bone; c, cleithrum.

35

36 **Supplementary Figure S2. No effect of hypergravity on osterix-DsRed signals.**

37 (a) The fluorescent signals for *osterix*-DsRed were observed 1 day before (day -1),  
38 immediately after (day 0), 1 day after (day 1), and 2 days after (day 2) hypergravity for  
39 mimicking the condition of loaded gravity during the launch of Soyuz. Left column  
40 shows the 1G control; and the right one, the hypergravity group. Scale bars = 100  $\mu$ m.  
41 (b) Quantitative analysis of the intensity of *osterix*-DsRed, which revealed no  
42 significant difference between the 1G control and hypergravity group. n.s., no  
43 significant difference.

44

45 **Supplementary Figure S3. MMP9-positive cells overlap with TRAP-positive cells.**

46 (a) Fluorescent images from ventral view in the head region of larva 5.3 mm in total  
47 length at 3 days after hatching. White arrows show the pharyngeal bone region. Merge  
48 (left), TRAP-GFP (middle), MMP9-DsRed (right). p, pigment cell. Scale bar = 200  $\mu$ m.

49 (b) TRAP staining and Von Kossa staining for MMP9-DsRed/TRAP-GFP transgenic  
50 line 9 days after hatching (7 mm total length). Black arrows indicate TRAP-positive  
51 osteoclasts. Scale bar = 200  $\mu$ m. (c) Fluorescent image of the same section seen in “b.”  
52 The green and red colors show the *TRAP*-GFP and *MMP9*-DsRed signals, respectively.  
53 The white arrows point to the *TRAP*- and *MMP9*-positive cells. (d-f) Enlarged views of  
54 the yellow-dotted square area in “c.” The merged image (d) shows the co-localization of  
55 *MMP9*-DsRed (e) and *TRAP*-GFP (f) in an osteoclast (white arrows). Scale bar = 20  
56  $\mu$ m.

57

58 **Supplementary Figure S4. No significant difference in fluorescent signals in**  
59 ***RANKL*-GFP line between ground and flight medaka.**

60 (a) Ventral view of *RANKL*-GFP transgenic line at day 1 after fertilization. *RANKL* was  
61 expressed at the pharyngeal bone region (yellow arrows in the dotted rectangle), and the  
62 fluorescent signal of *RANKL* was enhanced. Scale bar = 200  $\mu$ m. (b) Fluorescent  
63 images of *RANKL*-GFP in the pharyngeal bone region of the ground (left) and flight  
64 (right) medaka in a gel, which images were captured by the automatic handling  
65 technique shown in Figure 1. The images were captured under the same conditions  
66 between flight and ground samples shown in Supplementary Table S2. Yellow arrows  
67 point to the lower pharyngeal bone region. Scale bars = 50  $\mu$ m. (c) Comparison of the  
68 intensity of *RANKL*-GFP signals. Values are shown as mean  $\pm$  s.e.m. Ground, n=6 (days  
69 3, 4, 5); flight, n=3 (days 3, 4, 5), as given in Supplementary Table 1. n.s.; no  
70 significance by Student’s *t*-test.

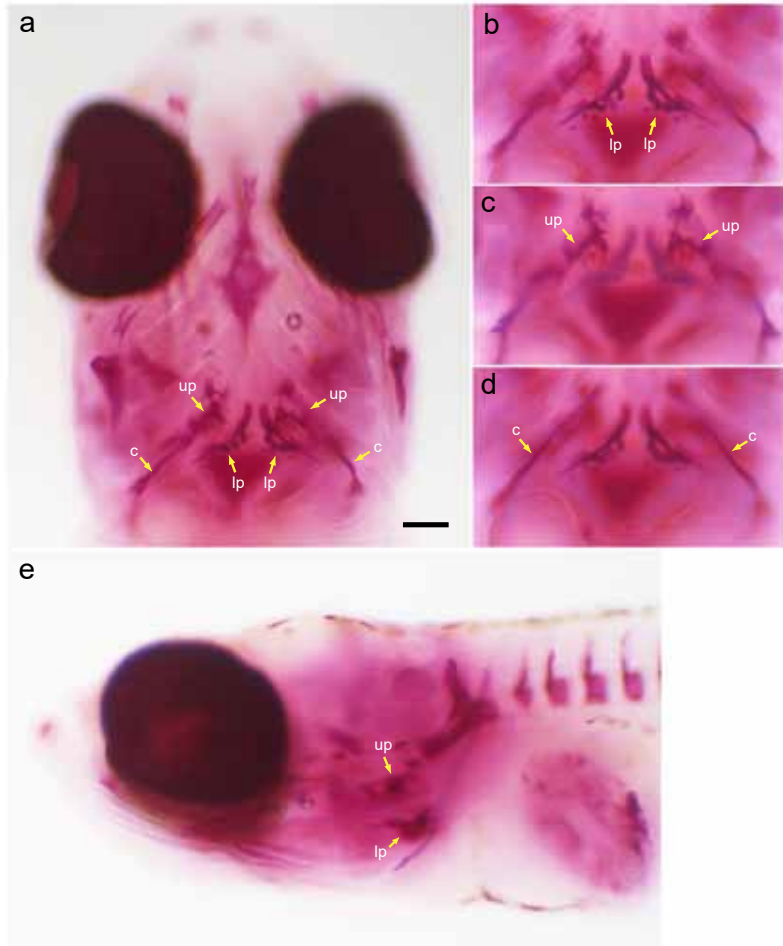

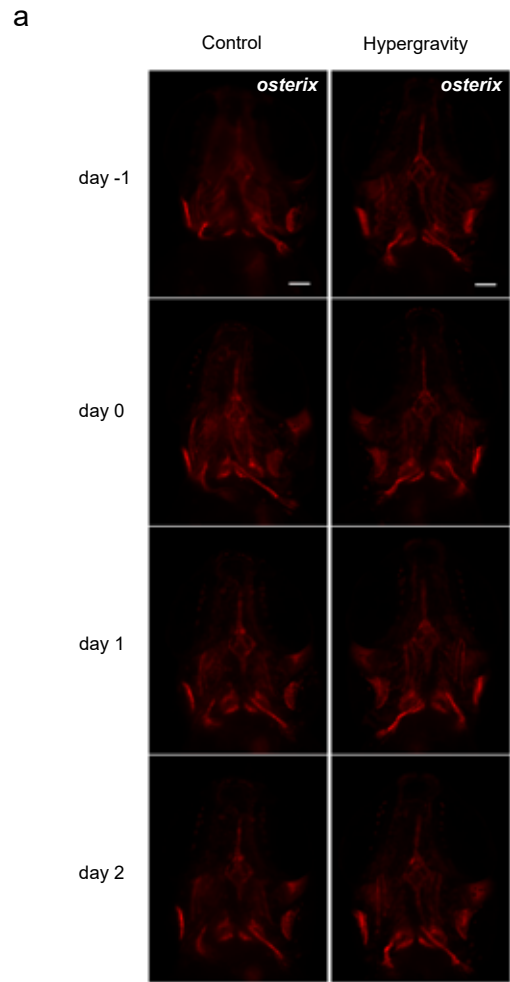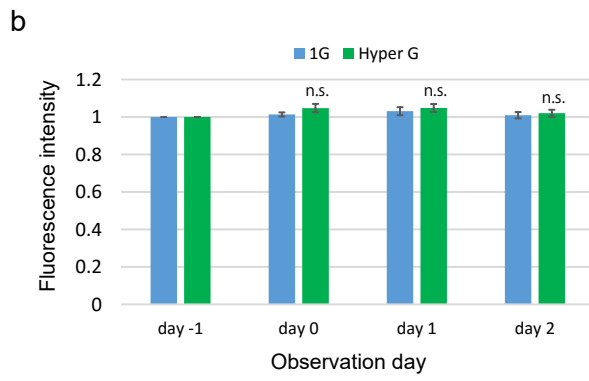

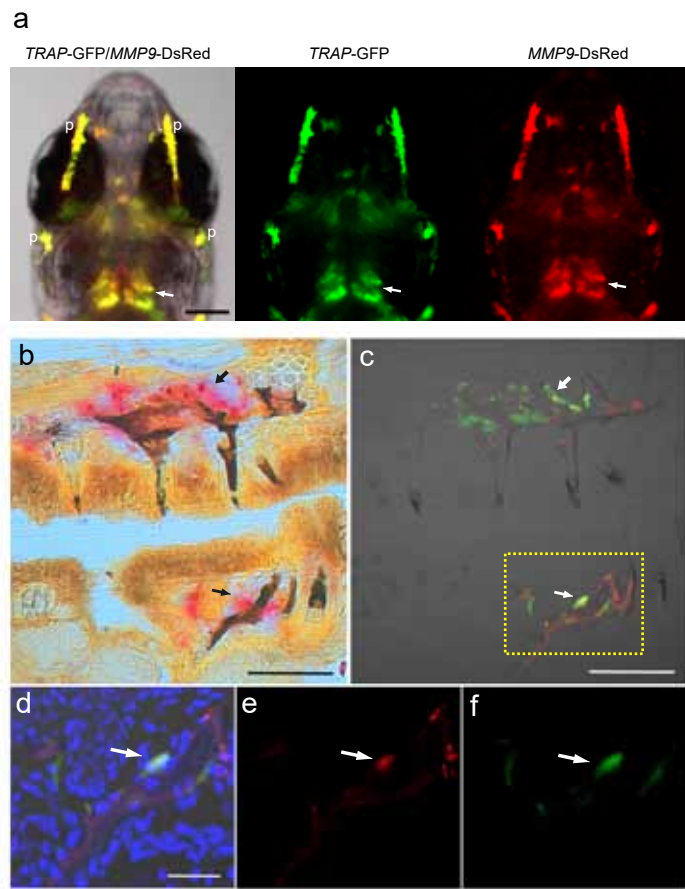

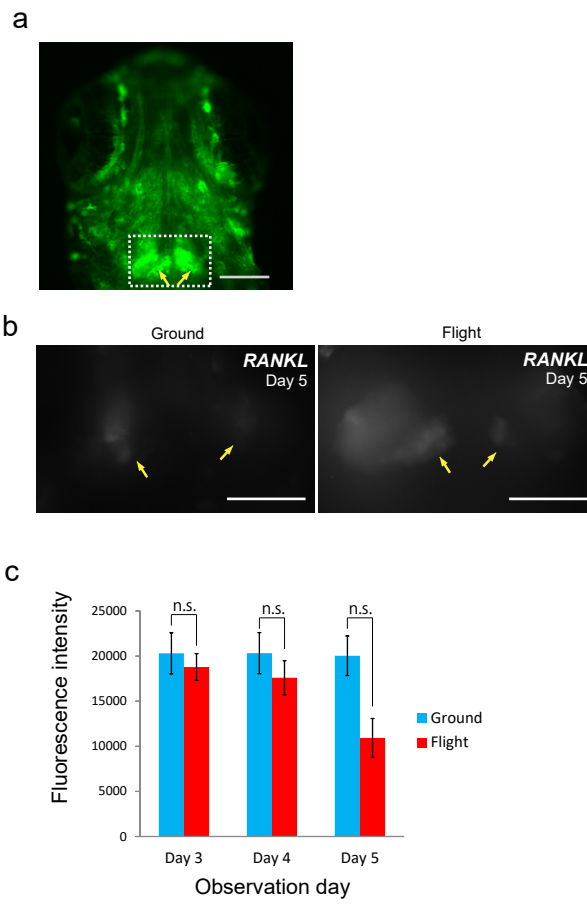

Supplementary Figure S4

| Ground |    |                                                                       | Flight |   |                                                 |
|--------|----|-----------------------------------------------------------------------|--------|---|-------------------------------------------------|
| Day    | N  | Animal ID for <i>Osterix-DsRed</i>                                    | Day    | N | Animal ID for <i>Osterix-DsRed</i>              |
| Day 1  | 9  | A1, A2, A4, A6, A7, A8, A9, A10, A11                                  | Day 1  | 6 | a1, a2, a3, a4, a5, a6                          |
| Day 2  | 10 | A1, A2, A4, A5, A6, A7, A8, A9, A10, A11                              | Day 2  | 6 | a1, a2, a3, a4, a5, a6                          |
| Day 3  | 10 | A1, A2, A4, A5, A6, A7, A8, A9, A10, A11                              | Day 3  | 6 | a1, a2, a3, a4, a5, a6                          |
| Day 4  | 10 | A1, A2, A4, A5, A6, A7, A8, A9, A10, A11                              | Day 4  | 7 | a1, a2, a3, a4, a5, a6, a7                      |
| Day 5  | 11 | A1, A2, A4, A5, A6, A7, A8, A9, A10, A11, A12                         | Day 5  | 7 | a1, a2, a3, a4, a5, a6, a7                      |
| Day 6  | 10 | A1, A4, A5, A6, A7, A8, A9, A11, A12, A13                             | Day 6  | 6 | a1, a3, a4, a5, a7, a8                          |
| Day 7  | 11 | A1, A4, A5, A7, A8, A9, A12, A14, A15, A16, A17                       | Day 7  | 5 | a1, a3, a5, a7, a8                              |
| Day 8  | 11 | A1, A4, A7, A9, A12, A14, A15, A16, A17, A18, A19                     | Day 8  | 4 | a3, a5, a7, a8                                  |
| Day    | N  | Animal ID for <i>Osteocalcin-DsRed</i>                                | Day    | N | Animal ID for <i>Osteocalcin-DsRed</i>          |
| Day 1  | 6  | B1, B2, B3, B4, B5, B6                                                | Day 1  | 3 | b1, b2, b3                                      |
| Day 2  | 7  | B1, B2, B3, B4, B5, B6, B8                                            | Day 2  | 3 | b1, b2, b3                                      |
| Day 3  | 7  | B1, B2, B3, B4, B5, B6, B8                                            | Day 3  | 5 | b1, b2, b3, b4, b5                              |
| Day 4  | 6  | B2, B4, B5, B6, B8, B10                                               | Day 4  | 4 | b2, b3, b4, b5                                  |
| Day 5  | 3  | B4, B8, B10                                                           | Day 5  | 4 | b2, b3, b4, b5                                  |
| Day    | N  | Animal ID for <i>TRAP-GFP</i>                                         | Day    | N | Animal ID for <i>TRAP-GFP</i>                   |
| Day 4  | 14 | A1, A2, A3, A4, A6, A7, A8, A9, A10, A11, B4, B5, B8, B10             | Day 4  | 9 | a1, a2, a3, a4, a5, a6, a7, b2, b3              |
| Day 6  | 16 | A1, A2, A4, A6, A7, A8, A9, A11, A12, B4, B8, B10, B12, B13, B14, B15 | Day 6  | 7 | a1, a3, a4, a5, a7, a8, b3                      |
| Day    | N  | Animal ID for <i>MMP9-DsRed</i>                                       | Day    | N | Animal ID for <i>MMP9-DsRed</i>                 |
| Day 4  | 6  | C1, C2, C3, C4, C5, C6                                                | Day 4  | 4 | c1, c2, c3, c4                                  |
| Day 6  | 6  | C1, C2, C3, C4, C5, C6                                                | Day 6  | 3 | c2, c3, c4                                      |
| Day    | N  | Animal ID for <i>RANKL-GFP</i>                                        | Day    | N | Animal ID for <i>RANKL-GFP</i>                  |
| Day 3  | 6  | C1, C2, C3, C4, C5, C6                                                | Day 3  | 3 | c1, c2, c3                                      |
| Day 4  | 6  | C1, C2, C3, C4, C5, C6                                                | Day 4  | 3 | c1, c3, c4                                      |
| Day 5  | 6  | C1, C2, C3, C4, C5, C6                                                | Day 5  | 3 | c1, c3, c4                                      |
| Day    | N  | Animal ID for <i>Osterix-DsRed (Whole-body)</i>                       | Day    | N | Animal ID for <i>Osterix-DsRed (Whole-body)</i> |
| Day 1  | 5  | A1, A2, A3, A4, A5                                                    | Day 1  | 3 | a1, a4, a8                                      |
| Day 2  | 5  | A1, A2, A3, A4, A5                                                    | Day 2  | 3 | a1, a4, a8                                      |
| Day 4  | 5  | A1, A2, A3, A4, A5                                                    | Day 4  | 4 | a1, a2, a4, a8                                  |
| Day 6  | 5  | A1, A2, A3, A4, A5                                                    | Day 6  | 3 | a1, a2, a8                                      |
| Day 7  | 5  | A2, A3, A4, A6, A7                                                    | Day 7  | 3 | a1, a2, a8                                      |

Supplementary Table S1 | The record of observation for individual medaka samples ( $n \geq 3$ ) in the ground control (left) and flight (right) group

“A-C” and “a-c” show the kind of transgenic lines for observation; Osterix-DsRed/TRAP-GFP transgenic line in the ground (A) and flight (a), Osteocalcin-DsRed/TRAP-GFP transgenic line in the ground (B) and flight (b), and MMP9-DsRed/RANKL-GFP transgenic line in the ground (C) and flight (c). “Day” means the observation day. “N” means the number of observed fish. The images of ground control samples were captured during 2014/06/09-2014/0616, and those of flight samples were captured during 2014/02/07-2014/02/14.



| Figure number | Object                     | Ground     |                      | Flight     |                      | Objective lens |
|---------------|----------------------------|------------|----------------------|------------|----------------------|----------------|
|               |                            | Gain value | Exposure time (msec) | Gain value | Exposure time (msec) |                |
| Figure 2c, d  | Osterix-DsRed (Whole-body) | 1.0        | 300                  | 1.0        | 300                  | 5x             |
| Figure 3a, b  | Osterix-DsRed              | 1.0        | 800                  | 1.0        | 800                  | 20x            |
| Figure 3e, f  | Osteocalcin-DsRed          | 1.0        | 3000                 | 1.0        | 3000                 | 20x            |
| Figure 4a, b  | TRAP-GFP                   | 1.0        | 300                  | 1.0        | 300                  | 20x            |
| Figure 4d, e  | MMP9-DsRed                 | 1.0        | 3000                 | 1.0        | 3000                 | 20x            |
| Figure S4b    | RANKL-GFP                  | 1.0        | 300                  | 1.0        | 300                  | 20x            |

Supplementary Table S2 | Fluorescence observation for the flight and ground control samples  
Both samples were observed under the same conditions.

| Up-regulated GO annotations                      | q-value     | Down-regulated GO annotations                          | q-value       |
|--------------------------------------------------|-------------|--------------------------------------------------------|---------------|
| <i>Molecular function</i>                        |             | <i>Molecular function</i>                              |               |
| DNA binding                                      | 0.0175393   | extracellular matrix structural constituent            | 0.00401414    |
| Heterocyclic compound binding                    | 0.0157555   | phosphotransferase activity, alcohol group as acceptor | 0.00974622    |
| Nucleic acid binding                             | 0.0000912   | protein kinase activity                                | 0.0195225     |
| Organic cyclic compound binding                  | 0.0157555   | receptor activity                                      | 0.00401414    |
| <i>Biological process</i>                        |             | <i>Biological process</i>                              |               |
| Cellular aromatic compound metabolic process     | 0.00896628  | muscle tissue development                              | 0.0205161     |
| Cellular nitrogen compound metabolic process     | 0.00675267  | phosphorylation                                        | 0.0293491     |
| DNA metabolic process                            | 0.00675267  | signal transduction                                    | 0.0205161     |
| DNA replication                                  | 0.00675267  | striated muscle tissue development                     | 0.0293491     |
| DNA replication initiation                       | 0.00146611  | <i>Cellular component</i>                              |               |
| Endoderm formation                               | 0.043615    | collagen trimer                                        | 0.00374939    |
| hematopoietic or lymphoid organ development      | 0.0269695   | contractile fiber part                                 | 0.0301749     |
| heterocycle metabolic process                    | 0.00675267  | extracellular matrix                                   | 0.000699573   |
| nitrogen compound metabolic process              | 0.00675267  | integral component of membrane                         | 0.00000000322 |
| nucleic acid metabolic process                   | 0.00675267  | integrin complex                                       | 0.0360586     |
| nucleobase-containing compound metabolic process | 0.00912311  | membrane                                               | 0.00000000322 |
| organic cyclic compound metabolic process        | 0.00675267  | membrane part                                          | 0.000000403   |
| <i>Cellular component</i>                        |             | plasma membrane                                        | 0.0360586     |
| MCM complex                                      | 0.0124825   | protein complex involved in cell adhesion              | 0.0360586     |
| nucleus                                          | 0.000302051 | proteinaceous extracellular matrix                     | 0.00210483    |
|                                                  |             | receptor complex                                       | 0.0360586     |

Supplementary Table S3 | Enriched systems by GO analysis for whole-body in-flight medaka at days 2 and 6

| Gene ID      | Gene title                                         | FC           | FC           | p-value | p-value |
|--------------|----------------------------------------------------|--------------|--------------|---------|---------|
|              |                                                    | (Day 2, F/G) | (Day 6, F/G) | (Day 2) | (Day 6) |
| LOC101166722 | Krueppel-like factor 9-like                        | 11.84        | 1.84         | 0.00005 | 0.0061  |
| LOC101166590 | TNFAIP3-interacting protein 1-like                 | 6.74         | 2.44         | 0.00005 | 0.0185  |
| LOC101164399 | GATA-binding factor 5-A-like                       | 6.13         | 3.04         | 0.00875 | 0.00665 |
| LOC101156885 | G0/G1 switch protein 2-like                        | 5.84         | 2.96         | 0.00005 | 0.00005 |
| LOC101157884 | cAMP-responsive element modulator-like             | 5.40         | 1.99         | 0.00005 | 0.0173  |
| LOC101166121 | tubulin beta-6 chain-like                          | 5.38         | 1.82         | 0.00025 | 0.01305 |
| LOC101175275 | serine/threonine-protein kinase SIK2-like          | 4.80         | 1.75         | 0.00005 | 0.0147  |
| LOC101169519 | early growth response protein 1-B-like             | 4.53         | 2.01         | 0.0043  | 0.0442  |
| LOC101162685 | unconventional myosin-XV-like                      | 4.45         | 2.37         | 0.0003  | 0.00145 |
| LOC101173775 | transcription factor Maf-like                      | 4.44         | 1.79         | 0.0007  | 0.02895 |
| LOC101170604 | PR domain zinc finger protein 1-like               | 4.18         | 1.80         | 0.00075 | 0.0413  |
| foxa3        | Me-FKH1                                            | 4.04         | 1.73         | 0.00005 | 0.0284  |
| gata-1       | hematopoietic transcription factor GATA-1          | 3.68         | 1.87         | 0.00005 | 0.0037  |
| LOC101170127 | Krueppel-like factor 2-like                        | 3.62         | 1.63         | 0.00005 | 0.0392  |
| LOC101155601 | CCAAT/enhancer-binding protein beta-like           | 3.62         | 2.40         | 0.00005 | 0.0037  |
| LOC101164062 | transcription factor jun-B-like                    | 3.58         | 2.52         | 0.00005 | 0.00315 |
| LOC101168009 | jun dimerization protein 2-like                    | 3.44         | 2.03         | 0.00005 | 0.00085 |
| LOC101172251 | neuronal PAS domain-containing protein 4-like      | 3.33         | 2.45         | 0.00055 | 0.00435 |
| LOC101174822 | transcription factor AP-1-like                     | 3.32         | 1.65         | 0.00005 | 0.0217  |
| LOC101169722 | early growth response protein 1-like               | 3.15         | 2.4          | 0.00005 | 0.00015 |
| LOC101175263 | nuclear receptor subfamily 0 group B member 2-like | 3.09         | 3.03         | 0.00005 | 0.00005 |
| c-fos        | c-fos                                              | 3.08         | 2.22         | 0.00005 | 0.002   |
| LOC101168635 | dnaJ homolog subfamily B member 5-like             | 3.00         | 2.66         | 0.00005 | 0.00005 |
| LOC101156434 | nuclear receptor subfamily 1 group D member 2-like | 2.93         | 1.68         | 0.00005 | 0.01375 |
| LOC101156720 | r3hdm1 R3H domain containing 1                     | 2.85         | 2.02         | 0.00005 | 0.0018  |
| LOC101172767 | CCAAT/enhancer-binding protein delta-like          | 2.84         | 2.24         | 0.00005 | 0.00335 |
| LOC101163664 | C8orf4                                             | 2.67         | 2.18         | 0.00005 | 0.0016  |
| LOC101161414 | TSC22 domain family, member 3                      | 2.41         | 1.80         | 0.00055 | 0.0426  |
| LOC101162015 | NF-kappa-B inhibitor alpha-like                    | 2.35         | 2.28         | 0.00015 | 0.00045 |
| LOC101163907 | signal-transducing adaptor protein 1-like          | 2.27         | 1.80         | 0.00025 | 0.00585 |
| LOC101159693 | vesicle-associated membrane protein 2-like         | 2.14         | 1.98         | 0.00345 | 0.00285 |
| LOC101165223 | GADD45 beta-like                                   | 2.56         | 2.99         | 0.00005 | 0.0003  |
| LOC101166663 | zinc finger protein 143-like                       | 2.25         | 2.46         | 0.0004  | 0.00065 |

Supplementary Table S4 | Up-regulation of nucleus-related genes in whole-body in flight (F) versus ground (G) at days 2 and 6

\*FC means fold change

| Gene ID      | Gene title | FC<br>(Day 6, F/G) | p-value | q-value    |
|--------------|------------|--------------------|---------|------------|
| LOC101173930 | mcm2       | 1.79               | 0.01155 | 0.0838772  |
| LOC101165815 | mcm7       | 2.04               | 0.00185 | 0.026006   |
| LOC101167880 | mcm5       | 2.69               | 0.00005 | 0.00194545 |
| LOC101155053 | mcmbp      | 2.17               | 0.0012  | 0.0192805  |
| LOC101159855 | mcm6       | 1.81               | 0.00985 | 0.0764144  |
| LOC101173977 | mcm4       | 2.46               | 0.0001  | 0.00340372 |
| LOC101165859 | mcm3       | 2.79               | 0.00005 | 0.00194545 |

Supplementary Table S5 | Up-regulation of MCM family in whole-body medaka at day 6 in flight (F) versus ground (G)

\*FC means fold change

| Gene ID                     | Gene title                                                     | FC     | FC     | p-value | p-value |
|-----------------------------|----------------------------------------------------------------|--------|--------|---------|---------|
|                             |                                                                | Day 2  | Day 6  | Day 2   | Day 6   |
| <i>Cell Adhesion</i>        |                                                                |        |        |         |         |
| LOC101166566                | claudin-5-like                                                 | 3.27   | 2.48   | 0.00005 | 0.00005 |
| LOC101156528                | claudin-7-like                                                 | -2.46  | -4.17  | 0.014   | 0.00005 |
| LOC101164424                | claudin-like protein ZF-A89-like                               | -4.20  | -3.11  | 0.0073  | 0.00035 |
| LOC101159003                | desmoglein-4-like                                              | -7.41  | -17.15 | 0.00305 | 0.00005 |
| LOC101165224                | desmoplakin-like                                               | -3.01  | -8.22  | 0.00035 | 0.00005 |
| LOC101160163                | neural cell adhesion molecule L1-like protein-like             | -2.38  | -3.29  | 0.0176  | 0.00005 |
| LOC101156181                | carcinoembryonic antigen-related cell adhesion molecule 1-like | -3.68  | -5.21  | 0.00255 | 0.00005 |
| LOC101174027                | integrin alpha-2-like                                          | -3.51  | -2.73  | 0.00415 | 0.00005 |
| <i>Channel, Transporter</i> |                                                                |        |        |         |         |
| LOC101160832                | solute carrier family 13 member 5-like                         | 15.56  | 2.03   | 0.00005 | 0.02465 |
| LOC101164809                | solute carrier family 25 member 38-A-like                      | 3.25   | 2.06   | 0.00005 | 0.0011  |
| LOC101161366                | solute carrier family 12 member 3-like                         | -7.57  | -3.23  | 0.00005 | 0.00005 |
| LOC101163089                | aquaporin-3-like                                               | -1.75  | -4.23  | 0.0183  | 0.00005 |
| LOC101156245                | ammonium transporter Rh type B-A-like                          | -3.36  | -3.29  | 0.01405 | 0.00805 |
| <i>Receptor</i>             |                                                                |        |        |         |         |
| LOC101155005                | sphingosine 1-phosphate receptor 1-like                        | -2.71  | -3.66  | 0.01175 | 0.00005 |
| LOC101154894                | macrophage mannose receptor 1-like                             | -2.45  | -3.56  | 0.0192  | 0.00005 |
| <i>Membrane-related</i>     |                                                                |        |        |         |         |
| LOC101166070                | transmembrane protease serine 4-like                           | -10.85 | -4.79  | 0.008   | 0.00005 |
| LOC101170062                | class I histocompatibility antigen, F10 alpha chain-like       | -8.88  | -8.22  | 0.0123  | 0.00005 |
| LOC101173791                | chondroitin sulfate proteoglycan 4-like                        | -2.99  | -2.39  | 0.01025 | 0.00095 |
| LOC101155676                | regulator of G-protein signaling 1-like                        | -2.89  | -2.69  | 0.008   | 0.00005 |
| LOC101172542                | cell cycle control protein 50B-like                            | -1.96  | -1.96  | 0.00265 | 0.00195 |
| LOC101156171                | gastric intrinsic factor-like                                  | -4.41  | -14.72 | 0.00005 | 0.00005 |
| LOC101163639                | C-type lectin domain family 4 member M-like                    | -2.08  | -3.39  | 0.00505 | 0.00005 |
| LOC101165853                | abca12 ATP-binding cassette, sub-family A (ABC1), member 12    | -2.16  | -3.18  | 0.01155 | 0.00005 |
| LOC101173994                | probable G-protein coupled receptor 116                        | -2.62  | -2.83  | 0.0104  | 0.00005 |
| LOC101158220                | calpain-5-like                                                 | -2.19  | -2.51  | 0.00585 | 0.00005 |
| LOC101173105                | kunitz-type protease inhibitor 1-like                          | -1.72  | -2.17  | 0.01795 | 0.0014  |
| LOC101159307                | transmembrane protein 54-like                                  | -1.79  | -2     | 0.01855 | 0.00125 |

Supplementary Table S6 | Alteration of the expression of membrane-related genes in whole-body medaka at days 2 and 6 in flight (F) versus ground (G)

\*FC means fold change
